# Supplementary material for: Double Jeopardy: Punitive Responses to Black Women Candidates’ Anger
Source: Research Square preprint supplement (doi:10.21203/rs.3.rs-8584399/v1), 2026-02-09

# Contents

|                                                                   |          |
|-------------------------------------------------------------------|----------|
| <b>Appendix</b>                                                   | <b>2</b> |
| <b>A Demographics</b>                                             | <b>2</b> |
| <b>B Balance Tests</b>                                            | <b>2</b> |
| <b>C Additional Results</b>                                       | <b>4</b> |
| C.1 Mediation Analysis . . . . .                                  | 5        |
| C.2 Table 5: Vote Likelihood (Black Male Respondents) . . . . .   | 5        |
| C.3 Table 6: Vote Likelihood (Black Female Respondents) . . . . . | 7        |
| C.4 Figure 1 . . . . .                                            | 9        |
| C.5 Figure 2 . . . . .                                            | 10       |

# Appendix

## A Demographics

Table 1: Demographic Summary Statistics

| Variable                       | Mean/Percent |
|--------------------------------|--------------|
| Age (Mean)                     | 44.9         |
| Bachelor’s Degree or Above (%) | 38.4         |
| Female (%)                     | 56.6         |
| White (%)                      | 49.8         |
| Democrat (%)                   | 37.3         |

## B Balance Tests

Balance tests indicated no need for controls. As such, we computed regression models without control variables. See Mutz (2019) for a discussion of when controlling for covariates in experiments is unnecessary or counterproductive in the presence of successful randomization.

Table 2: Covariate Balance by Candidate Race and Gender (All Respondents)

| Treatment                   | Covariate         | SMD    |
|-----------------------------|-------------------|--------|
| <i>Panel A: Black Woman</i> |                   |        |
| Angry vs Control            | Age               | -0.003 |
|                             | Education         | 0.098  |
|                             | Ideology          | 0.025  |
|                             | Party ID          | -0.012 |
|                             | Race              | -0.003 |
|                             | Racial Resentment | 0.058  |
|                             | Female            | 0.035  |
| Angry+Race vs Control       | Age               | -0.019 |
|                             | Education         | -0.044 |

Table 2 (continued)

| Treatment                   | Covariate         | SMD    |
|-----------------------------|-------------------|--------|
|                             | Ideology          | 0.025  |
|                             | Party ID          | 0.102  |
|                             | Race              | -0.003 |
|                             | Racial Resentment | -0.056 |
|                             | Female            | -0.012 |
| <i>Panel B: Black Man</i>   |                   |        |
| Angry vs Control            | Age               | -0.027 |
|                             | Education         | 0.008  |
|                             | Ideology          | 0.044  |
|                             | Party ID          | 0.014  |
|                             | Race              | 0.009  |
|                             | Racial Resentment | 0.003  |
|                             | Female            | 0.014  |
| Angry+Race vs Control       | Age               | 0.054  |
|                             | Education         | -0.030 |
|                             | Ideology          | 0.007  |
|                             | Party ID          | -0.063 |
|                             | Race              | 0.001  |
|                             | Racial Resentment | -0.079 |
|                             | Female            | -0.015 |
| <i>Panel C: White Woman</i> |                   |        |
| Angry vs Control            | Age               | -0.034 |
|                             | Education         | -0.054 |
|                             | Ideology          | 0.005  |
|                             | Party ID          | 0.027  |
|                             | Race              | 0.001  |
|                             | Racial Resentment | -0.035 |
|                             | Female            | 0.038  |
| Angry+Race vs Control       | Age               | 0.076  |
|                             | Education         | 0.154  |
|                             | Ideology          | 0.012  |
|                             | Party ID          | -0.117 |
|                             | Race              | -0.007 |
|                             | Racial Resentment | -0.027 |

Table 2 (continued)

| Treatment                 | Covariate         | SMD    |
|---------------------------|-------------------|--------|
|                           | Female            | -0.011 |
| <i>Panel D: White Man</i> |                   |        |
| Angry vs Control          | Age               | -0.108 |
|                           | Education         | -0.028 |
|                           | Ideology          | 0.004  |
|                           | Party ID          | 0.022  |
|                           | Race              | -0.029 |
|                           | Racial Resentment | -0.001 |
|                           | Female            | 0.036  |
| Angry+Race vs Control     | Age               | 0.035  |
|                           | Education         | 0.032  |
|                           | Ideology          | -0.015 |
|                           | Party ID          | 0.011  |
|                           | Race              | 0.010  |
|                           | Racial Resentment | 0.063  |
|                           | Female            | -0.027 |

*Continued on next page*

## C Additional Results

In this section, we present the full set of results for mediation analyses, additional regression models for vote likelihood by Black male and female respondents interacted with community nationalis mand intersectional consciousness, as well as additional stereotype figures.

## C.1 Mediation Analysis

Table 3: Mediation Results: Unqualified (White Female Respondents, by Racial Resentment Quantiles)

| Candidate   | Resentment  | ACME    | ADE     | Total  | Prop. Mediated |
|-------------|-------------|---------|---------|--------|----------------|
| White Woman | Low (25th)  | 0.02    | -0.005  | 0.015  | 1.349          |
| White Woman | High (75th) | 0.024*  | -0.016  | 0.007  | 3.337          |
| White Man   | Low (25th)  | 0.016   | -0.076* | -0.060 | -0.269         |
| White Man   | High (75th) | 0.026*  | 0.021   | 0.046  | 0.555          |
| Black Man   | Low (25th)  | -0.005  | -0.030  | -0.035 | 0.151          |
| Black Man   | High (75th) | -0.007  | -0.044  | -0.052 | 0.144          |
| Black Woman | Low (25th)  | -0.022* | 0.028   | 0.005  | -4.101         |
| Black Woman | High (75th) | -0.020  | 0.034   | 0.015  | -1.369         |

Note: \*  $p < .05$

Table 4: Mediation Results: Competent (White Female Respondents, by Racial Resentment Quantiles)

| Candidate   | Resentment  | ACME    | ADE     | Total  | Prop. Mediated |
|-------------|-------------|---------|---------|--------|----------------|
| White Woman | Low (25th)  | -0.004  | 0.019   | 0.015  | -0.270         |
| White Woman | High (75th) | -0.012  | 0.019   | 0.007  | -1.696         |
| White Man   | Low (25th)  | 0.026   | -0.086* | -0.060 | -0.427         |
| White Man   | High (75th) | 0.040** | 0.006   | 0.046  | 0.861          |
| Black Man   | Low (25th)  | -0.023  | -0.012  | -0.035 | 0.658          |
| Black Man   | High (75th) | -0.024  | -0.028  | -0.052 | 0.463          |
| Black Woman | Low (25th)  | -0.013  | 0.018   | 0.005  | -2.283         |
| Black Woman | High (75th) | -0.015  | 0.029   | 0.015  | -1.025         |

Note: \*  $p < .05$ , \*\*  $p < .01$

## C.2 Table 5: Vote Likelihood (Black Male Respondents)

Table 5: Linear regression models estimating vote likelihood for each candidate interacted with intersectional consciousness (models 1–4) and community nationalism (models 5–8) for Black male respondents. Treatment conditions include Angry and Racialized Anger. Dependent variables represent likelihood of voting for the White Man (WM), Black Man (BM), Black Woman (BW), and White Woman (WW).

|                              | Intersectional Consciousness |                    |                    |                    | Community Nationalism |                    |                    |                    |
|------------------------------|------------------------------|--------------------|--------------------|--------------------|-----------------------|--------------------|--------------------|--------------------|
|                              | Black Woman<br>(1)           | Black Man<br>(2)   | White Woman<br>(3) | White Man<br>(4)   | Black Woman<br>(5)    | Black Man<br>(6)   | White Woman<br>(7) | White Man<br>(8)   |
| Angry BW                     | 0.15<br>(0.09)               |                    |                    |                    | 0.19<br>(0.14)        |                    |                    |                    |
| Angry+Race BW                | 0.05<br>(0.08)               |                    |                    |                    | 0.10<br>(0.14)        |                    |                    |                    |
| Angry BM                     |                              | -0.06<br>(0.09)    |                    |                    |                       | -0.02<br>(0.13)    |                    |                    |
| Angry+Race BM                |                              | 0.03<br>(0.08)     |                    |                    |                       | -0.13<br>(0.12)    |                    |                    |
| Angry WW                     |                              |                    | 0.08<br>(0.09)     |                    |                       |                    | 0.18<br>(0.17)     |                    |
| Angry+Race WW                |                              |                    | -0.03<br>(0.09)    |                    |                       |                    | 0.11<br>(0.15)     |                    |
| Angry WM                     |                              |                    |                    | 0.05<br>(0.10)     |                       |                    |                    | 0.001<br>(0.16)    |
| Angry+Race WM                |                              |                    |                    | -0.03<br>(0.09)    |                       |                    |                    | -0.19<br>(0.15)    |
| Intersectional Consciousness | 0.27 ***<br>(0.08)           | 0.15 *<br>(0.08)   | 0.13<br>(0.09)     | 0.18 *<br>(0.10)   |                       |                    |                    |                    |
| Angry BW*IC                  | -0.21 *<br>(0.12)            |                    |                    |                    |                       |                    |                    |                    |
| Angry+Race BW*IC             | -0.04<br>(0.11)              |                    |                    |                    |                       |                    |                    |                    |
| Angry BM*IC                  |                              | 0.11<br>(0.12)     |                    |                    |                       |                    |                    |                    |
| Angry+Race BM*IC             |                              | 0.08<br>(0.12)     |                    |                    |                       |                    |                    |                    |
| Angry WW*IC                  |                              |                    | -0.18<br>(0.12)    |                    |                       |                    |                    |                    |
| Angry+Race WW*IC             |                              |                    | 0.03<br>(0.13)     |                    |                       |                    |                    |                    |
| Angry WM*IC                  |                              |                    |                    | -0.11<br>(0.14)    |                       |                    |                    |                    |
| Angry+Race WM*IC             |                              |                    |                    | 0.09<br>(0.13)     |                       |                    |                    |                    |
| Community Nationalism        |                              |                    |                    |                    | 0.53 ***<br>(0.12)    | 0.43 ***<br>(0.12) | 0.43 ***<br>(0.14) | 0.24 *<br>(0.14)   |
| Angry BW*CN                  |                              |                    |                    |                    | -0.25<br>(0.19)       |                    |                    |                    |
| Angry+Race BW*CN             |                              |                    |                    |                    | -0.09<br>(0.19)       |                    |                    |                    |
| Angry BM*CN                  |                              |                    |                    |                    |                       | 0.07<br>(0.18)     |                    |                    |
| Angry+Race BM*CN             |                              |                    |                    |                    |                       | 0.28 *<br>(0.16)   |                    |                    |
| Angry WW*CN                  |                              |                    |                    |                    |                       |                    | -0.29<br>(0.22)    |                    |
| Angry+Race WW*CN             |                              |                    |                    |                    |                       |                    | -0.14<br>(0.20)    |                    |
| Angry WM*CN                  |                              |                    |                    |                    |                       |                    |                    | -0.05<br>(0.21)    |
| Angry+Race WM*CN             |                              |                    |                    |                    |                       |                    |                    | 0.28<br>(0.20)     |
| Constant                     | 0.54 ***<br>(0.06)           | 0.59 ***<br>(0.06) | 0.57 ***<br>(0.06) | 0.45 ***<br>(0.07) | 0.34 ***<br>(0.09)    | 0.37 ***<br>(0.09) | 0.34 ***<br>(0.11) | 0.39 ***<br>(0.10) |
| Observations                 | 267                          | 257                | 260                | 243                | 267                   | 257                | 260                | 243                |
| R <sup>2</sup>               | 0.08                         | 0.08               | 0.02               | 0.05               | 0.11                  | 0.23               | 0.05               | 0.07               |
| Adjusted R <sup>2</sup>      | 0.06                         | 0.06               | 0.004              | 0.03               | 0.09                  | 0.21               | 0.03               | 0.05               |

Note: \*  $p < 0.10$ , \*\*  $p < 0.05$ , \*\*\*  $p < 0.01$ .

**C.3 Table 6: Vote Likelihood (Black Female Respondents)**

Table 6: Linear regression models estimating vote likelihood for each candidate interacted with intersectional consciousness (models 1–4) and community nationalism (models 5–8) for Black female respondents. Treatment conditions include Angry and Racialized Anger. Dependent variables represent likelihood of voting for the White Man (WM), Black Man (BM), Black Woman (BW), and White Woman (WW).

|                              | Intersectional Consciousness |                    |                    |                    | Community Nationalism |                    |                    |                    |
|------------------------------|------------------------------|--------------------|--------------------|--------------------|-----------------------|--------------------|--------------------|--------------------|
|                              | Black Woman<br>(1)           | Black Man<br>(2)   | White Woman<br>(3) | White Man<br>(4)   | Black Woman<br>(5)    | Black Man<br>(6)   | White Woman<br>(7) | White Man<br>(8)   |
| Angry BW                     | -0.16 **<br>(0.08)           |                    |                    |                    | -0.11<br>(0.13)       |                    |                    |                    |
| Angry+Race BW                | 0.06<br>(0.08)               |                    |                    |                    | 0.15<br>(0.13)        |                    |                    |                    |
| Angry BM                     |                              | 0.03<br>(0.09)     |                    |                    |                       | -0.11<br>(0.13)    |                    |                    |
| Angry+Race BM                |                              | -0.02<br>(0.09)    |                    |                    |                       | -0.10<br>(0.12)    |                    |                    |
| Angry WW                     |                              |                    | -0.16 **<br>(0.08) |                    |                       |                    | -0.14<br>(0.12)    |                    |
| Angry+Race WW                |                              |                    | -0.12<br>(0.08)    |                    |                       |                    | -0.13<br>(0.12)    |                    |
| Angry WM                     |                              |                    |                    | 0.05<br>(0.09)     |                       |                    |                    | -0.02<br>(0.13)    |
| Angry+Race WM                |                              |                    |                    | 0.02<br>(0.09)     |                       |                    |                    | -0.08<br>(0.13)    |
| Intersectional Consciousness | 0.20 ***<br>(0.06)           | 0.12 *<br>(0.06)   | 0.18 ***<br>(0.06) | 0.28 ***<br>(0.08) |                       |                    |                    |                    |
| Angry BW*IC                  | -0.02<br>(0.10)              |                    |                    |                    |                       |                    |                    |                    |
| Angry+Race BW*IC             | -0.08<br>(0.10)              |                    |                    |                    |                       |                    |                    |                    |
| Angry BM*IC                  |                              | 0.03<br>(0.10)     |                    |                    |                       |                    |                    |                    |
| Angry+Race BM*IC             |                              | -0.13<br>(0.10)    |                    |                    |                       |                    |                    |                    |
| Angry WW*IC                  |                              |                    | 0.02<br>(0.10)     |                    |                       |                    |                    |                    |
| Angry+Race WW*IC             |                              |                    | -0.06<br>(0.10)    |                    |                       |                    |                    |                    |
| Angry WM*IC                  |                              |                    |                    | 0.06<br>(0.11)     |                       |                    |                    |                    |
| Angry+Race WM*IC             |                              |                    |                    | -0.04<br>(0.11)    |                       |                    |                    |                    |
| Community Nationalism        |                              |                    |                    |                    | 0.34 ***<br>(0.09)    | 0.28 ***<br>(0.09) | 0.36 ***<br>(0.09) | 0.43 ***<br>(0.10) |
| Angry BW*CN                  |                              |                    |                    |                    | -0.05<br>(0.14)       |                    |                    |                    |
| Angry+Race BW*CN             |                              |                    |                    |                    | 0.09<br>(0.14)        |                    |                    |                    |
| Angry BM*CN                  |                              |                    |                    |                    |                       | -0.08<br>(0.14)    |                    |                    |
| Angry+Race BM*CN             |                              |                    |                    |                    |                       | 0.09<br>(0.14)     |                    |                    |
| Angry WW*CN                  |                              |                    |                    |                    |                       |                    | 0.04<br>(0.14)     |                    |
| Angry+Race WW*CN             |                              |                    |                    |                    |                       |                    | -0.01<br>(0.14)    |                    |
| Angry WM*CN                  |                              |                    |                    |                    |                       |                    |                    | -0.02<br>(0.15)    |
| Angry+Race WM*CN             |                              |                    |                    |                    |                       |                    |                    | 0.11<br>(0.15)     |
| Constant                     | 0.47 ***<br>(0.05)           | 0.47 ***<br>(0.05) | 0.51 ***<br>(0.06) | 0.38 ***<br>(0.06) | 0.48 ***<br>(0.07)    | 0.46 ***<br>(0.07) | 0.49 ***<br>(0.08) | 0.30 ***<br>(0.08) |
| Observations                 | 356                          | 335                | 348                | 371                | 356                   | 335                | 348                | 371                |
| R <sup>2</sup>               | 0.09                         | 0.05               | 0.07               | 0.05               | 0.07                  | 0.06               | 0.06               | 0.04               |
| Adjusted R <sup>2</sup>      | 0.08                         | 0.04               | 0.05               | 0.04               | 0.05                  | 0.04               | 0.04               | 0.03               |

Note: \*  $p < 0.10$ , \*\*  $p < 0.05$ , \*\*\*  $p < 0.01$ .

## C.4 Figure 1

Figure 1: Candidate traits for Black and White Candidates (Black Respondents Only)

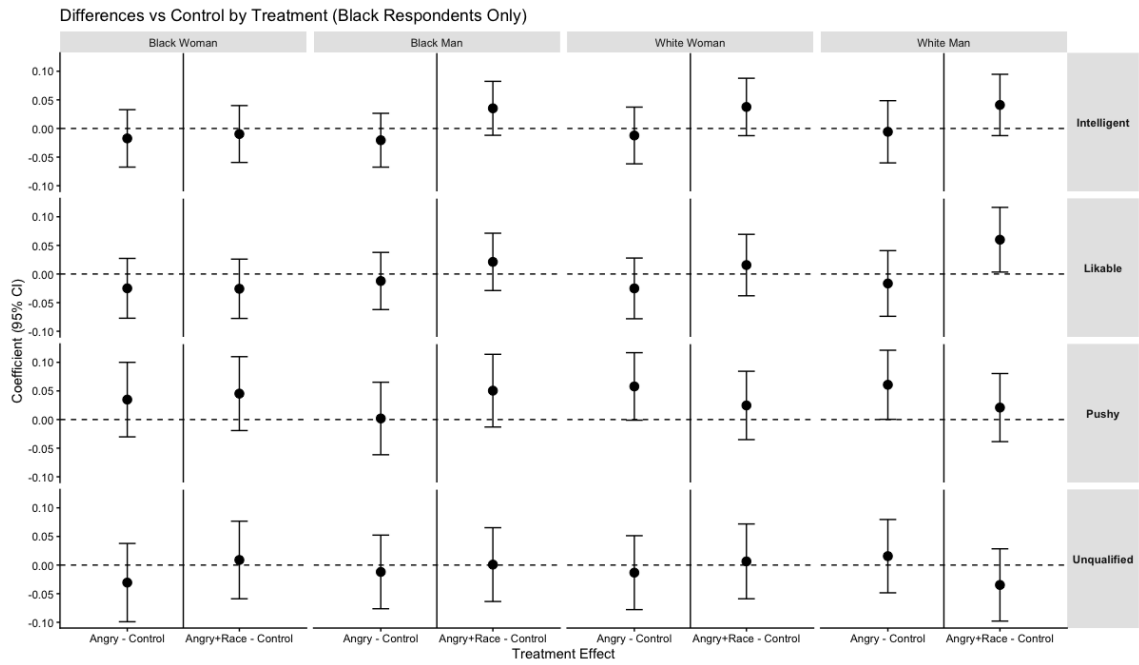

## C.5 Figure 2

Figure 2: Candidate traits for Black and White Candidates (White Respondents Only)

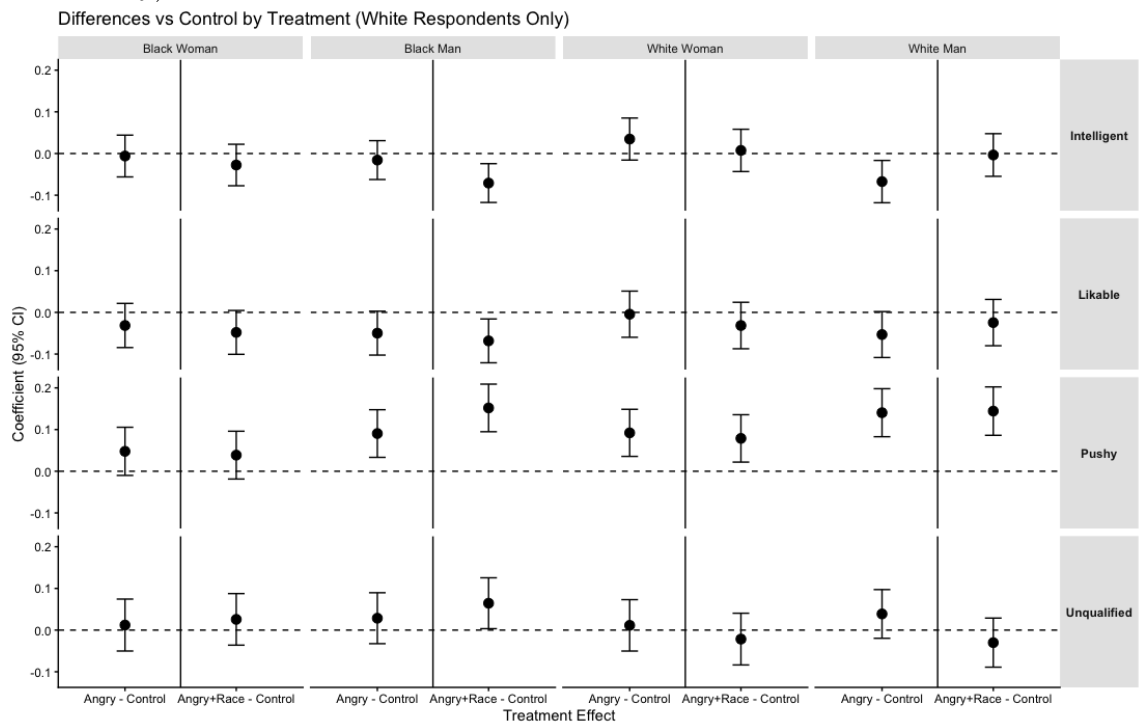

Supplement: Supplementary file 1 [file dd31569bc2c7eb7d1eab0576.pdf]
